# Supplementary material
Source: PubMed Central journal article supplement (PMC8370222)

## Supplementary files

**Figure S1.** Phenotypic characterization of resistant and persister isolates K2534 and K3325 by time-kill curves and TD test in the presence of imipenem.

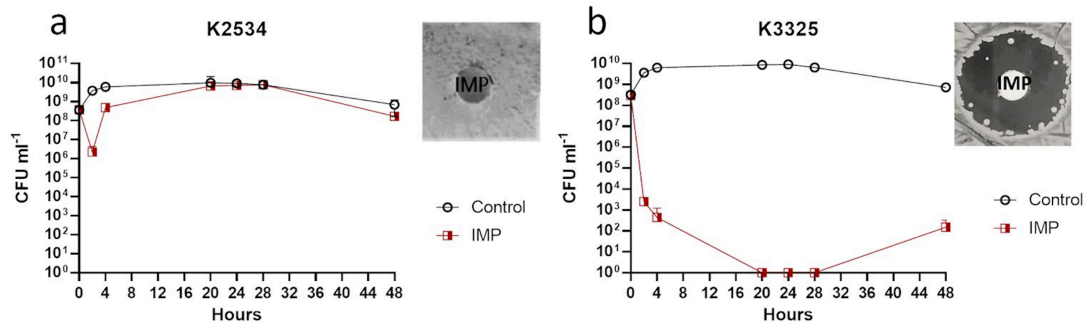

**Figure S2.** Phenotypic characterization of the lytic phage vB\_KpnM-VAC13. (a, b) Host-range of vB\_KpnM-VAC 13 with K2534 and K3325, respectively, determined by spot test and infection curves at MOIs of 1 and 10. (c) Adsorption curve of vB\_KpnM-VAC13 with K2534. The ordinate axis shows the percentage of free phages, reaching their minimum at four minutes (time of adsorption). (d) One-step growth curve of vB\_KpnM-VAC13 with K2534. The ordinate axis represents the number of PFUs in log scale. The latency period corresponds to the time before release of the progeny, which determines the start of the burst size. (e) TEM micrographs of vB\_KpnM-VAC13 lytic phage.

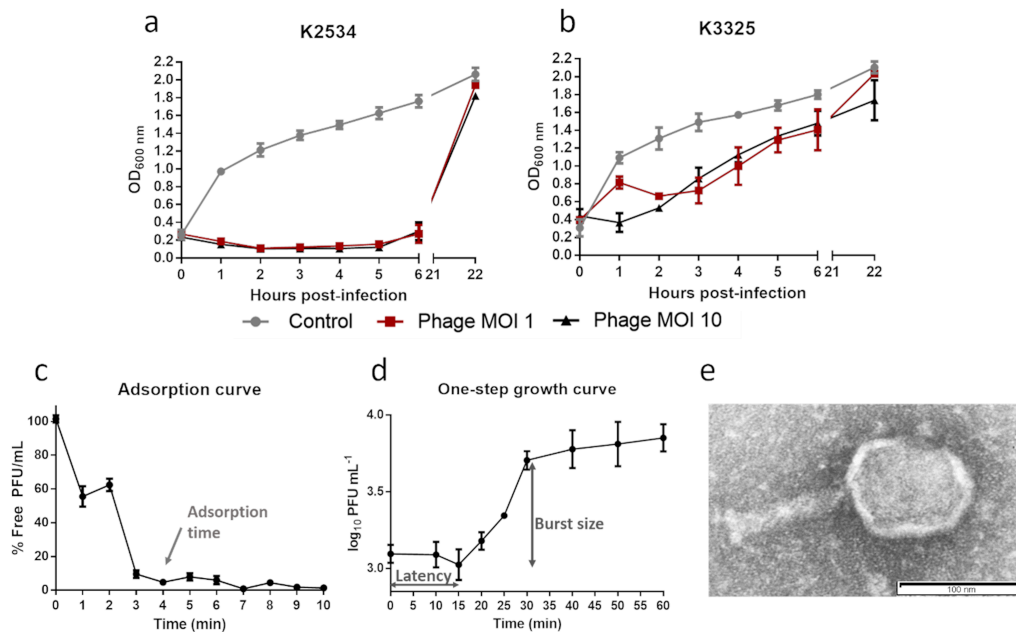

Supplement: aac.00900-21-s0001.pdf [file aac.00900-21-s0001.pdf]
